# Supplementary material
Source: PubMed Central journal article supplement (PMC4702749)
Supplement: JCM.02833-15_zjm999094713so1.pdf [file JCM.02833-15_zjm999094713so1.pdf]

176 **SUPPLEMENTAL TABLES**177 **Table S1. ASPE Primers for HIV-1 group M subtype B**

| Primer no | Type <sup>a</sup> | Sequence (5'-3')                                                                                   | Tag ID <sup>b</sup> | Position <sup>c</sup> |
|-----------|-------------------|----------------------------------------------------------------------------------------------------|---------------------|-----------------------|
| 1         | M41               | Tag- AA <u>GAA</u> AAA ATA AAA GCA TTA <u>RYA</u> <u>GAA</u> ATT TGT <u>RMW</u> GAR A <sup>d</sup> | 45                  | 2632 - 2670           |
| 2         | 41L               | Tag- AA <u>GAA</u> AAA ATA AAA GCA TTA <u>RYA</u> <u>GAA</u> ATT TGT <u>RMW</u> GAR C              | 38                  | 2632 - 2670           |
| 3         | K65               | Tag- A AAT CCA <u>TAC</u> <u>AAT</u> ACT CCA <u>GTA</u> TTT GCY ATA <u>AAG</u> AA                  | 12                  | 2708 - 2743           |
| 4         | 65R               | Tag- A AAT CCA <u>TAC</u> <u>AAT</u> ACT CCA <u>GTA</u> TTT GCY ATA <u>AAG</u> AG                  | 13                  | 2708 - 2743           |
| 5         | K70               | Tag- CCA GTA TTT GCC ATA AAG <u>AAA</u> AAR <u>RAY</u> <u>RGT</u> ACT AA                           | 18                  | 2724 - 2758           |
| 6         | 70R               | Tag- CCA GTA TTT GCC ATA AAG <u>AAA</u> AAR <u>RAY</u> <u>RGT</u> ACT AG                           | 21                  | 2724 - 2758           |
| 7         | L74               | Tag- C ATA <u>AAG</u> <u>AAA</u> AAR GAC AGT <u>ACY</u> ARR TGG AGA AAA <u>Y</u>                   | 67                  | 2735 - 2769           |
| 8         | 74V               | Tag- C ATA <u>AAG</u> <u>AAA</u> AAR GAC AGT <u>ACY</u> ARR TGG AGA AAA G                          | 90                  | 2735 - 2769           |
| 9         | Y115              | Tag- A <u>GTA</u> <u>CTR</u> <u>GAT</u> <u>GTR</u> <u>GGT</u> GAT GCA TA                           | 73                  | 2870 - 2893           |

|    |      |                                                                                                                |    |             |
|----|------|----------------------------------------------------------------------------------------------------------------|----|-------------|
| 10 | 115F | Tag- A <u>GTA</u> <u>CTR</u> <u>GAT</u> <u>GTR</u> <u>GGT</u> <u>GAT</u> GCA TT                                | 62 | 2870 - 2893 |
| 11 | Q151 | Tag- GG ATT AGR TAT <u>CAR</u> <u>TAC</u> <u>AAT</u> GTR <u>CTY</u> <u>CCA</u> C                               | 29 | 2971 - 3000 |
| 12 | 151M | Tag- GG ATT AGR TAT <u>CAR</u> <u>TAC</u> <u>AAT</u> GTR <u>CTY</u> <u>CCA</u> A                               | 36 | 2971 - 3000 |
| 13 | M184 | Tag- <u>AGA</u> <u>AAA</u> <u>CAA</u> AAT CCA GAM <u>ATR</u> <u>GTT</u> <u>ATC</u> <u>TRT</u> <u>CAA</u> TAY A | 37 | 3063 - 3099 |
| 14 | 184V | Tag- <u>AGA</u> <u>AAA</u> <u>CAA</u> AAT CCA GAM <u>ATR</u> <u>GTT</u> <u>ATC</u> <u>TRT</u> <u>CAA</u> TAY G | 22 | 3063 - 3099 |
| 15 | K219 | Tag- <u>ARG</u> TGG GGR TTT <u>WMY</u> <u>ACA</u> <u>CCA</u> <u>GAY</u> A                                      | 53 | 3180 - 3204 |
| 16 | 219Q | Tag- <u>ARG</u> TGG GGR TTT <u>WMY</u> <u>ACA</u> <u>CCA</u> <u>GAY</u> C                                      | 44 | 3180 - 3204 |
| 17 | 219E | Tag- <u>ARG</u> TGG GGR TTT <u>WMY</u> <u>ACA</u> <u>CCA</u> <u>GAY</u> G                                      | 96 | 3180 - 3204 |
| 18 | L100 | Tag- CAA TTA <u>GGA</u> <u>ATA</u> <u>CCA</u> <u>CAY</u> <u>CCH</u> <u>KCA</u> GGR <u>Y</u>                    | 42 | 2820 - 2847 |
| 19 | 100I | Tag- CAA TTA <u>GGA</u> <u>ATA</u> <u>CCA</u> <u>CAY</u> <u>CCH</u> <u>KCA</u> GGR A                           | 58 | 2820 - 2847 |
| 20 | K101 | Tag- AA TTA <u>GGA</u> <u>ATA</u> <u>CCA</u> <u>CAY</u> <u>CCH</u> <u>GCA</u> GGR <u>HTA</u> A                 | 55 | 2821 - 2850 |
| 21 | 101P | Tag- AA TTA <u>GGA</u> <u>ATA</u> <u>CCA</u> <u>CAY</u> <u>CCH</u> <u>GCA</u> GGR <u>HTA</u> CC                | 89 | 2821 - 2851 |

|    |      |                                                                                                            |    |             |
|----|------|------------------------------------------------------------------------------------------------------------|----|-------------|
| 22 | 101E | Tag- AA TTA <u>GGA</u> ATA CCA <u>CAY</u> <u>CCH</u> <u>GCA</u> GGR <u>HTA</u> G                           | 65 | 2821 - 2850 |
| 23 | K103 | Tag- GA ATA CCA <u>CAT</u> <u>CCY</u> <u>KCA</u> GGG <u>HTA</u> <u>MAA</u> AAG <u>AAR</u>                  | 19 | 2827 - 2858 |
| 24 | 103N | Tag- GA ATA CCA <u>CAT</u> <u>CCY</u> <u>KCA</u> GGG <u>HTA</u> <u>MAA</u> AAG <u>AAC</u>                  | 66 | 2827 - 2858 |
| 25 | 103R | Tag- GA ATA CCA <u>CAT</u> <u>CCY</u> <u>KCA</u> GGG <u>HTA</u> <u>MAA</u> AAG AGA                         | 63 | 2827 - 2858 |
| 26 | V106 | Tag- A <u>CAT</u> <u>CCY</u> <u>KCA</u> GGG <u>HTA</u> <u>MAA</u> AAG <u>ARV</u> <u>AAA</u> <u>TCA</u> GT  | 20 | 2834 - 2866 |
| 27 | 106A | Tag- A <u>CAT</u> <u>CCY</u> <u>KCA</u> GGG <u>HTA</u> <u>MAA</u> AAG <u>ARV</u> <u>AAA</u> <u>TCA</u> GC  | 39 | 2834 - 2866 |
| 28 | 106M | Tag- A <u>CAT</u> <u>CCY</u> <u>KCA</u> GGG <u>HTA</u> <u>MAA</u> AAG <u>ARV</u> <u>AAA</u> <u>TCA</u> ATG | 75 | 2834 - 2867 |
| 29 | Y181 | Tag- G <u>CCT</u> TTT AGA <u>AAR</u> <u>SAA</u> AAT CCA GAM <u>ATR</u> <u>GTT</u> <u>ATY</u> TA            | 9  | 3056 - 3091 |
| 30 | 181C | Tag- G <u>CCT</u> TTT AGA <u>AAR</u> <u>SAA</u> AAT CCA GAM <u>ATR</u> <u>GTT</u> <u>ATY</u> TG            | 82 | 3056 - 3091 |
| 31 | Y188 | Tag- CA GAM <u>ATR</u> <u>GTT</u> ATC TRT CAA TAY RTG <u>GAT</u> GAY TTR TA                                | 83 | 3076 - 3112 |
| 32 | 188L | Tag- CA GAM <u>ATR</u> <u>GTT</u> ATC TRT CAA TAY RTG <u>GAT</u> GAY TTR <u>TT</u>                         | 93 | 3076 - 3112 |
| 33 | G190 | Tag- ATA <u>GTT</u> <u>ATY</u> <u>TAT</u> CAA TAC <u>RTG</u> GAT <u>GAY</u> TTR TAT <u>GTW</u> GG          | 97 | 3081 - 3118 |

|    |      |                                                                                      |    |             |
|----|------|--------------------------------------------------------------------------------------|----|-------------|
| 34 | 190A | Tag- ATA GTT <u>ATY</u> TAT CAA TAC <u>RTG</u> GAT GAY <u>TTR</u> TAT GTW <u>GC</u>  | 76 | 3081 - 3118 |
| 35 | V32  | Tag- CT CTA <u>TTR</u> GAY ACA GGA GCA GAT GAY ACA G                                 | 14 | 2317 - 2346 |
| 36 | 32I  | Tag- CT CTA <u>TTR</u> GAY ACA GGA GCA GAT GAY ACA A                                 | 48 | 2317 - 2346 |
| 37 | I47  | Tag- TG CCA GGA <u>ARA</u> TGG AAR <u>CCA</u> ARA ATR A                              | 30 | 2365 - 2391 |
| 38 | 47V  | Tag- G CCA GGA <u>ARA</u> TGG AAR <u>CCA</u> ARA ATR GT                              | 43 | 2366 - 2392 |
| 39 | 47A  | Tag- G CCA GGA <u>ARA</u> TGG AAR <u>CCA</u> ARA ATR GC                              | 78 | 2366 - 2392 |
| 40 | L76  | Tag- AA ATC <u>TGT</u> GGR <u>CAT</u> <u>ARA</u> GCT RTR <u>GGT</u> ACA GTA <u>T</u> | 28 | 2446 - 2478 |
| 41 | 76V  | Tag- AA ATC <u>TGT</u> GGR <u>CAT</u> <u>ARA</u> GCT RTR <u>GGT</u> ACA GTA <u>G</u> | 70 | 2446 - 2478 |
| 42 | I84  | Tag- A GTA TTA RTA <u>GGA</u> <u>CCY</u> ACA CCT GTC AAY A                           | 35 | 2474 - 2502 |
| 43 | 84V  | Tag- A GTA TTA RTA <u>GGA</u> <u>CCY</u> ACA CCT GTC AAY G                           | 77 | 2474 - 2502 |
| 44 | L90  | Tag- CA CCT GTC AAC ATA ATT GGA <u>AGR</u> AAY <u>CTR</u> T                          | 95 | 2491 - 2520 |
| 45 | 90M  | Tag- CA CCT GTC AAC ATA ATT GGA <u>AGR</u> AAY <u>CTR</u> A                          | 57 | 2491 - 2520 |

178

179 <sup>a</sup> One primer for each wild-type and one or two primers for each mutant type were designed at 20 mutation loci.

180 <sup>b</sup> Each Tag matches with one of the MagPlex®-TAG™ Microspheres.

181 <sup>c</sup> Positions are based on HXB2 sequence. All ASPE primers begin upstream of the mutation of interest.

182 <sup>d</sup> Bases different from the subtype C ASPE primers were underlined (Zhang G, Cai F, Zhou Z, DeVos J, Wagar N, Diallo

183 K, Zulu I, Wadonda-Kabondo N, Stringer JS, Weidle PJ, Ndongmo CB, Sikazwe I, Sarr A, Kagoli M, Nkengasong J, Gao

184 F, Yang C. 2013. Simultaneous Detection of Major Drug Resistance Mutations in the Protease and Reverse Transcriptase

185 Genes for HIV-1 Subtype C by Use of a Multiplex Allele-Specific Assay. *Journal of clinical microbiology* 51:3666-3674.)

186 **Table S2.** Comparison of drug resistance mutations identified by the Sanger  
 187 sequencing with those identified by the MAS assay

| No. | ID <sup>a</sup> | Drug resistance Mutations <sup>b</sup>        |                                                      |
|-----|-----------------|-----------------------------------------------|------------------------------------------------------|
|     |                 | Sanger sequencing                             | MAS                                                  |
| 1   | HN1             | K70KR, K103N, Y115F, M184V,<br>K219Q          | K70KR, K103N, Y115F, M184V,<br>K219Q                 |
| 2   | HN2             | None                                          | None                                                 |
| 3   | HN8             | K103R                                         | K103R                                                |
| 4   | HN11            | K101E, K103R                                  | K101E, K103R                                         |
| 5   | HN13            | M41L, K70R, K101E, M184V,<br>K219E            | M41L, K70R, K101E, <b>K103KN</b> ,<br>M184V, K219E   |
| 6   | HN14            | K103R                                         | K103R                                                |
| 7   | HN15            | Y181C, M184MV                                 | <b>K65KR</b> , Y181C, M184MV                         |
| 8   | HN16            | None                                          | None                                                 |
| 9   | HN17            | None                                          | None                                                 |
| 10  | HN18            | None                                          | None                                                 |
| 11  | HN19            | K103R                                         | K103R                                                |
| 12  | HN20            | K101KE, Y181YC, M184MV                        | K101KE, Y181YC, M184MV                               |
| 13  | HN21            | None                                          | None                                                 |
| 14  | HN24            | None                                          | None                                                 |
| 15  | HN27            | None                                          | None                                                 |
| 16  | HN32            | L100I, K103N, Y115F, Q151M,<br>M184V, K219E   | L100I, K103N, <b>Y115YF</b> , Q151M,<br>M184V, K219E |
| 17  | HN34            | <b>M41L<sup>c</sup></b> , K103R, M184V, G190A | K103R, M184V, G190A                                  |
| 18  | HN37            | None                                          | None                                                 |

|    |      |                                               |                              |
|----|------|-----------------------------------------------|------------------------------|
| 19 | HN38 | K103KN                                        | K103KN                       |
| 20 | HN39 | None                                          | None                         |
| 21 | HN40 | None                                          | None                         |
| 22 | HN42 | None                                          | None                         |
| 23 | HN45 | None                                          | None                         |
| 24 | HN47 | L74LV, L100IL, K103N, M184MV                  | L74LV, L100IL, K103N, M184MV |
| 25 | HN48 | K103N, M184V                                  | K103N, <b>M184MV</b>         |
| 26 | HN50 | None                                          | None                         |
| 27 | HN59 | None                                          | None                         |
| 28 | HN63 | M184V, <b>Y188L<sup>c</sup></b>               | M184V                        |
| 29 | HN68 | None                                          | None                         |
| 30 | HN70 | None                                          | None                         |
| 31 | HN71 | K70R, Y181YC, M184V, <b>K219E<sup>c</sup></b> | K70R, Y181YC, M184V          |
| 32 | HN72 | None                                          | None                         |
| 33 | HN74 | None                                          | None                         |
| 34 | HN75 | K103R                                         | K103R                        |
| 35 | HN76 | None                                          | None                         |
| 36 | HN79 | K103KR                                        | K103KR                       |
| 37 | HN80 | L74V                                          | L74V                         |
| 38 | HN81 | K70R, <b>Y181C<sup>c</sup></b> , M184V, K219Q | K70R, M184V, K219Q           |
| 39 | HN82 | None                                          | None                         |
| 40 | HN83 | None                                          | None                         |
| 41 | HN85 | K103KR                                        | K103KR                       |
| 42 | HN86 | K103R, V106A, M184V                           | K103R, V106A, M184V          |
| 43 | HN89 | K103R                                         | K103R                        |

|    |       |                                                                  |                                                                                              |
|----|-------|------------------------------------------------------------------|----------------------------------------------------------------------------------------------|
| 44 | HN90  | None                                                             | None                                                                                         |
| 45 | HN91  | None                                                             | None                                                                                         |
| 46 | HN93  | M41ML, K70R, K103N, M184V,<br>G190A                              | M41ML, K70R, K103N, M184V,<br>G190A                                                          |
| 47 | HN96  | None                                                             | None                                                                                         |
| 48 | HN97  | K70KR, L74LV, K103N, M184MV,<br>K219KE                           | <b>V32VI<sup>d</sup></b> , <b>I47IV<sup>d</sup></b> , K70KR, L74LV,<br>K103N, M184MV, K219KE |
| 49 | HN98  | None                                                             | None                                                                                         |
| 50 | HN100 | <b>K70KR<sup>c</sup></b> , K103N, Y181C, M184V,<br><b>K219KE</b> | K103N, Y181C, M184V                                                                          |
| 51 | HN101 | K103KN, V106VM                                                   | <b>K101KE</b> , K103KN, V106VM                                                               |
| 52 | HN102 | None                                                             | None                                                                                         |
| 53 | HN103 | M184MV, K103N                                                    | M184MV, <b>K103KN</b>                                                                        |
| 54 | HN104 | K103N                                                            | K103N                                                                                        |
| 55 | HN106 | K103N, M184MV                                                    | K103N, M184MV                                                                                |
| 56 | HN107 | None                                                             | None                                                                                         |
| 57 | HN109 | K103R                                                            | K103R                                                                                        |
| 58 | HN110 | K103R                                                            | K103R                                                                                        |
| 59 | HN111 | None                                                             | None                                                                                         |
| 60 | HN112 | None                                                             | None                                                                                         |
| 61 | HN113 | None                                                             | None                                                                                         |
| 62 | HN114 | M41L, K70R, K101E, Y181C,<br>M184V, G190A                        | <b>L90M<sup>d</sup></b> , M41L, K70R, K101E,<br>Y181C, M184V, G190A                          |
| 63 | HN115 | None                                                             | None                                                                                         |
| 64 | HN117 | M184MV                                                           | M184MV                                                                                       |



|    |       |               |               |
|----|-------|---------------|---------------|
| 65 | HN118 | K101E, K103R  | K101E, K103R  |
| 66 | HN119 | None          | None          |
| 67 | HN120 | K103R         | K103R         |
| 68 | HN122 | None          | None          |
| 69 | HN123 | K103R, Y181YC | K103R, Y181YC |

---

188 <sup>a</sup> Subject identifier (ID).

189 <sup>b</sup> Major mutations that confer resistance to protease and reverse transcriptase inhibitors.

190 Discordant drug resistance mutations are shown in bold.

191 <sup>c</sup> Indeterminate results by the MAS assay.

192 <sup>d</sup> Protease inhibitor (PI) mutations.
